# Supplementary figures and images for: Monitoring the risk ofLegionellainfection using a general Bayesian network updated from temporal measurements in agricultural irrigation with reclaimed wastewater
Source: Royal Society of Chemistry journal article supplement (doi:10.1039/d2ew00311b), 2022-11-24

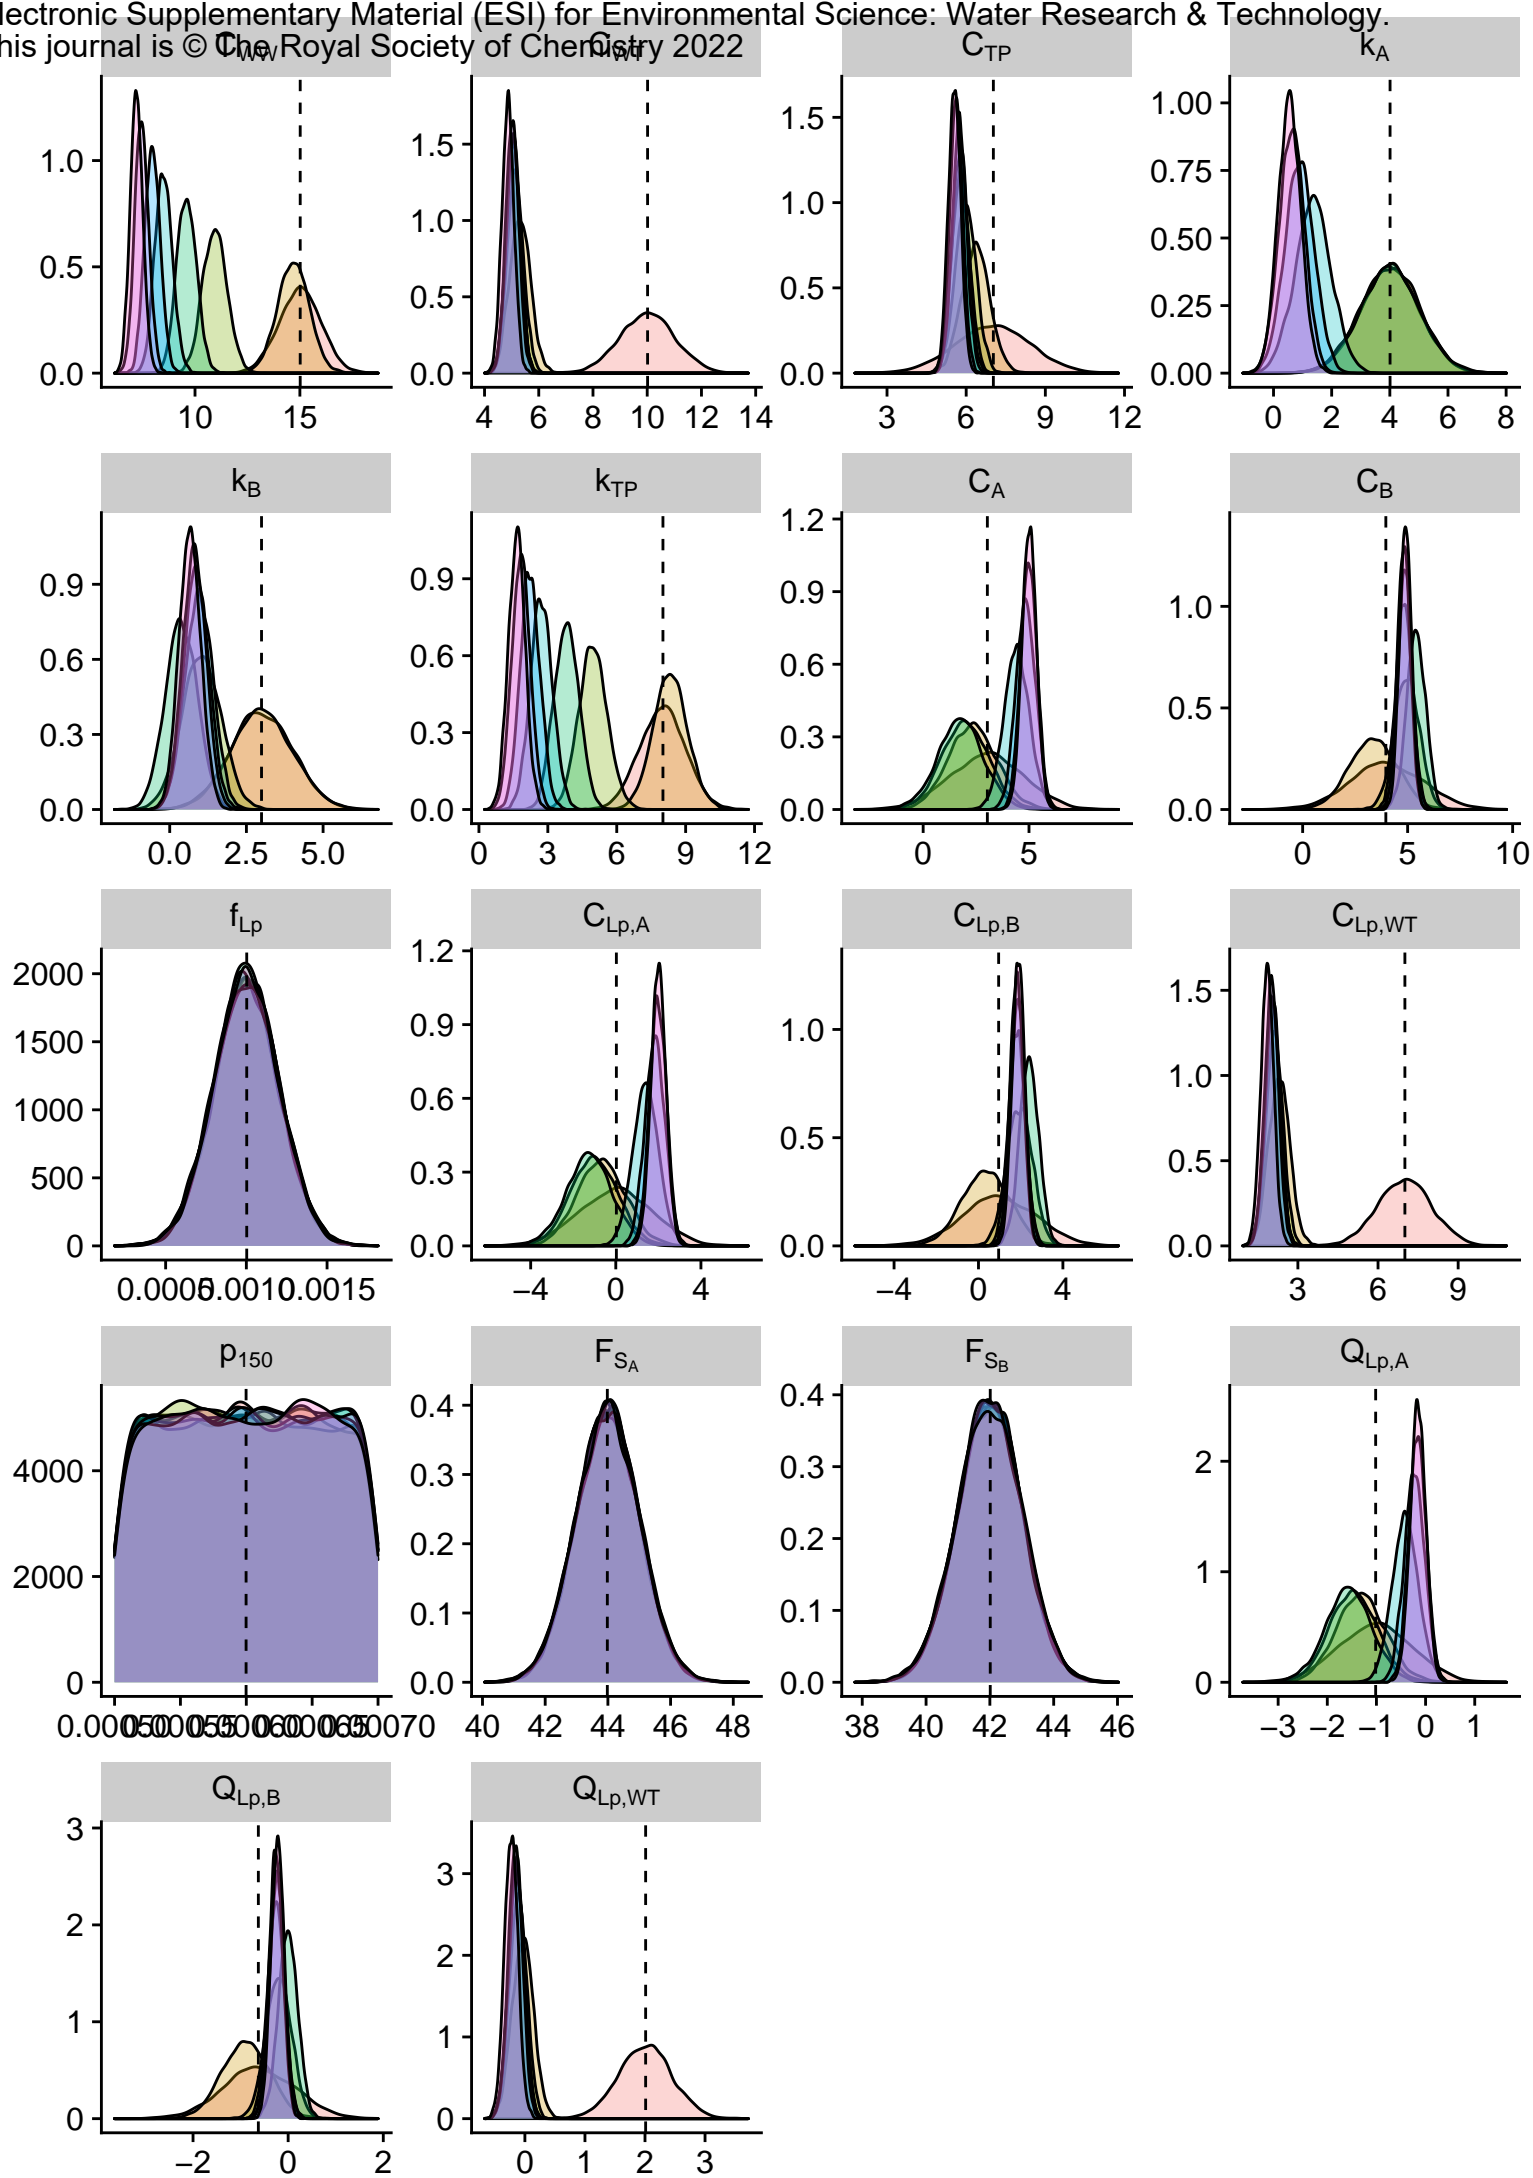

Supplement: d2ew00311b1.pdf [file d2ew00311b1.pdf]

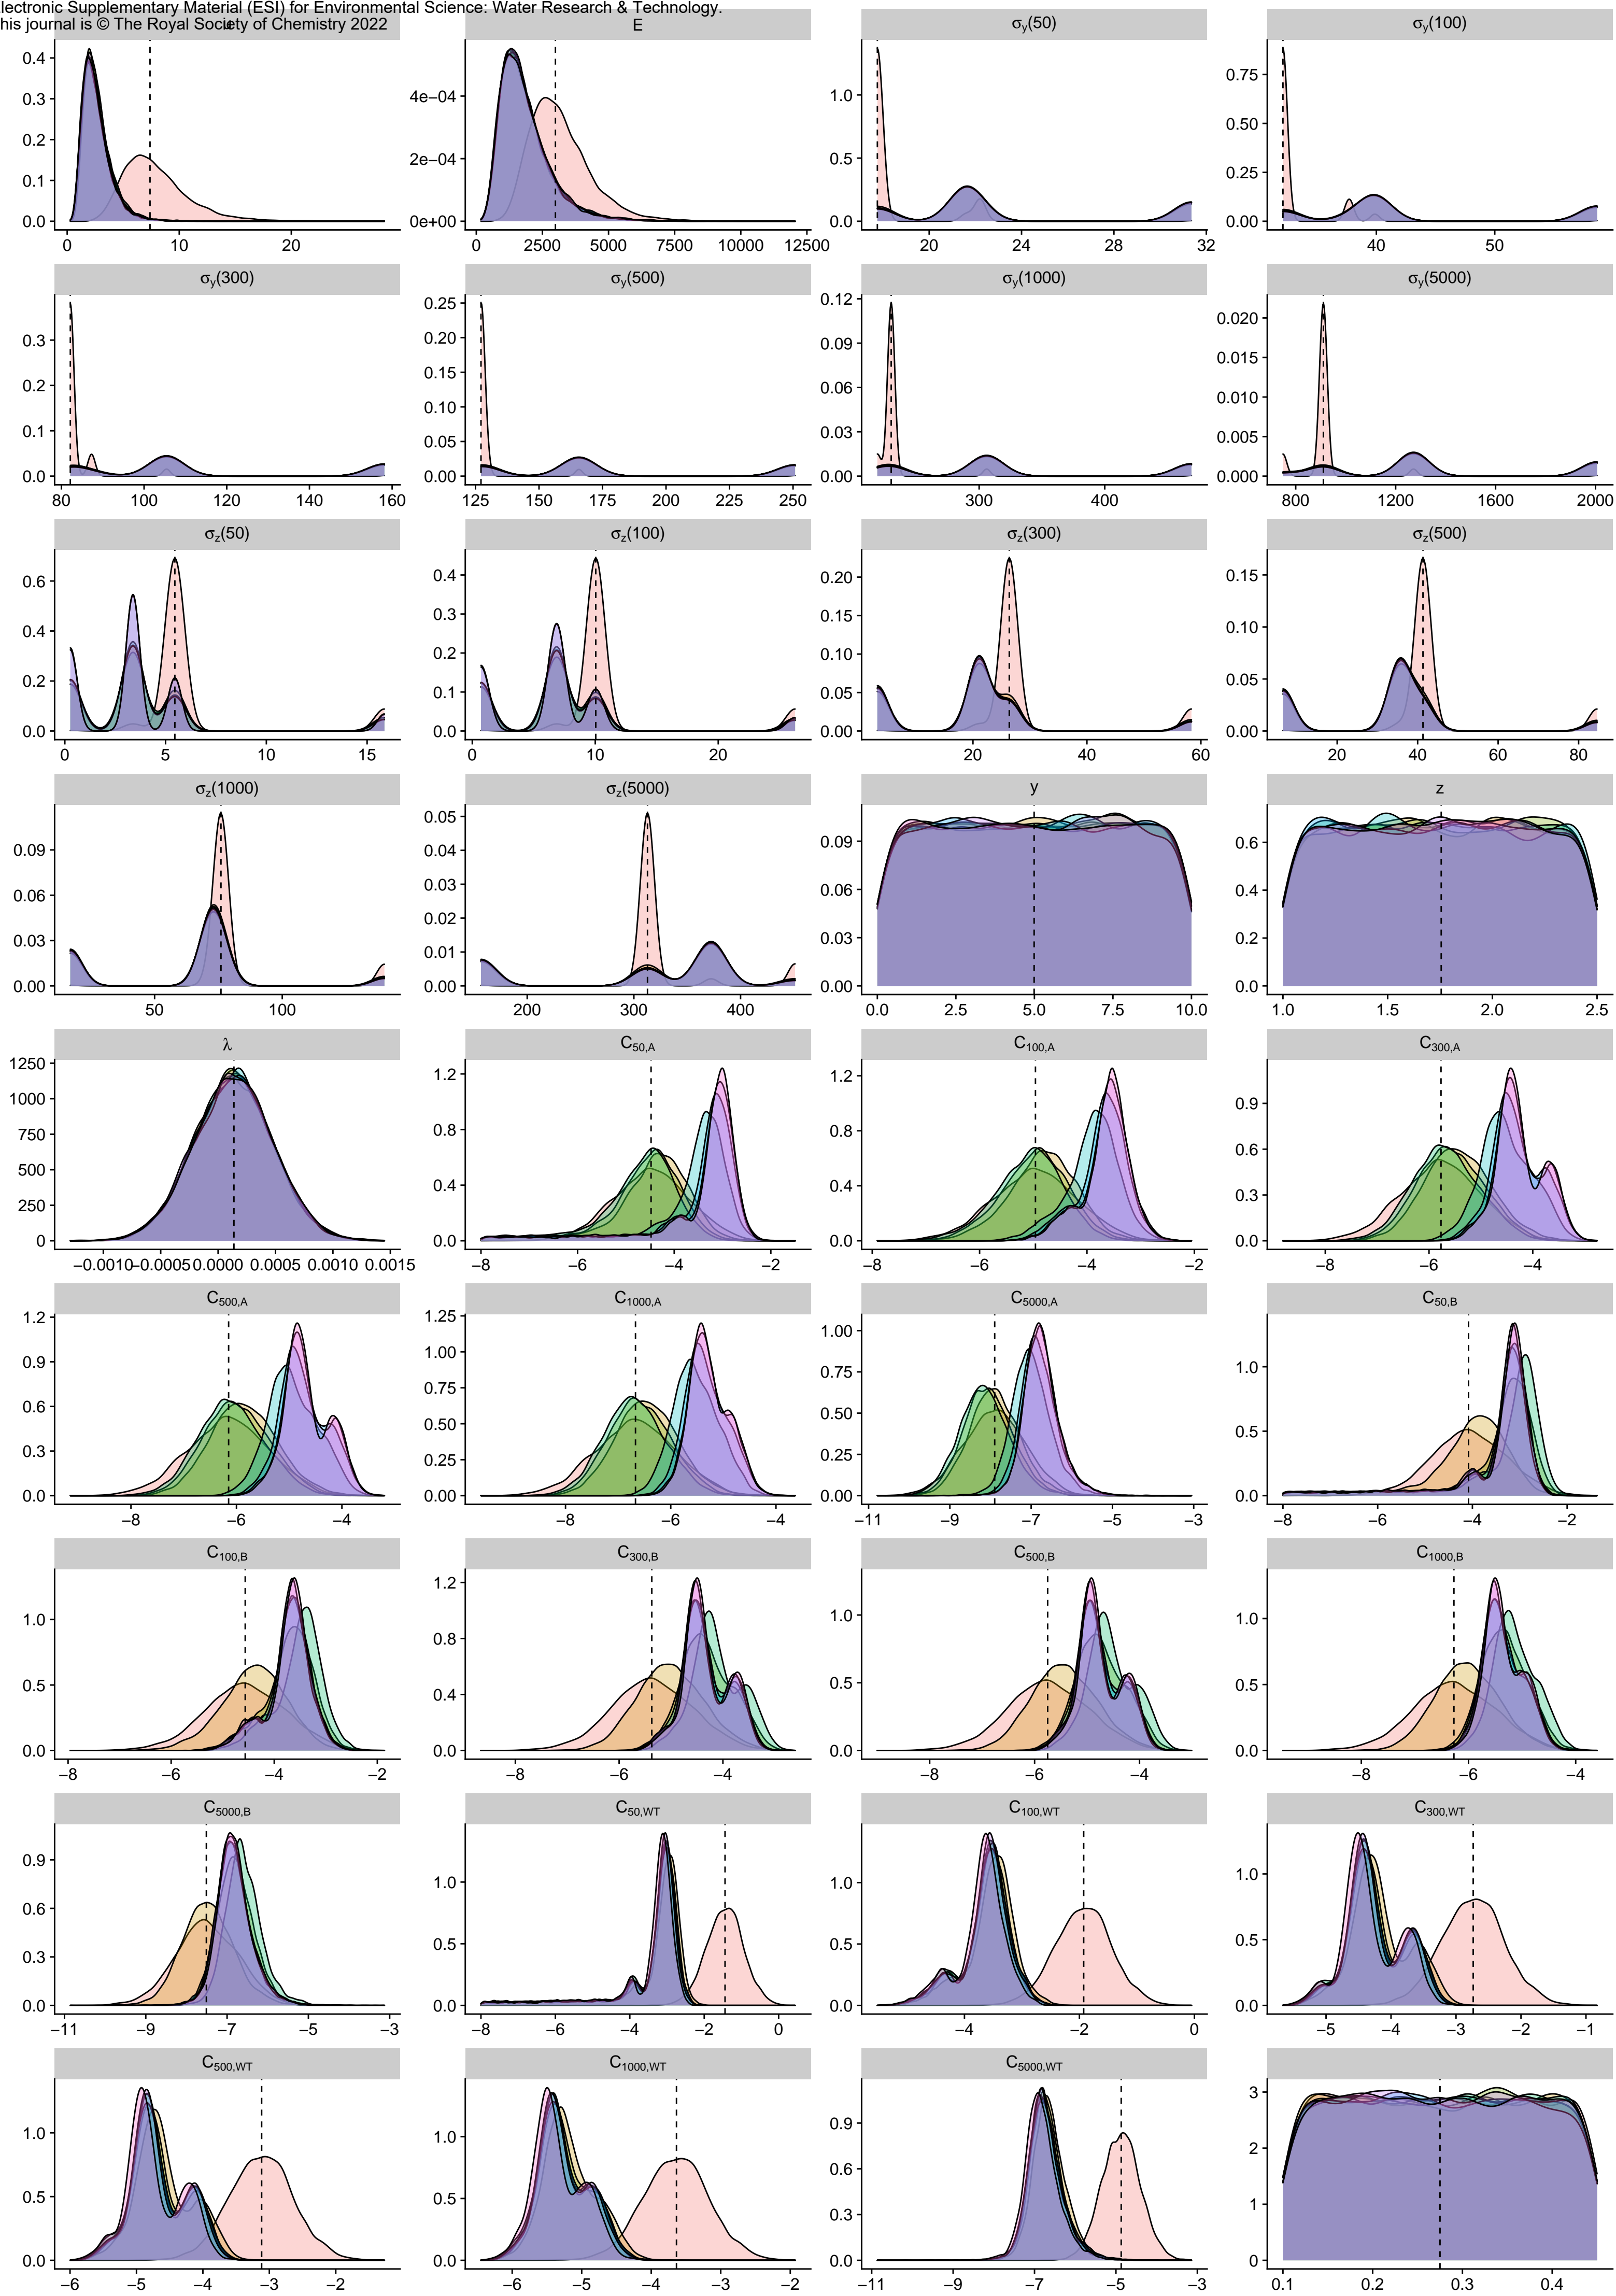

Supplement: d2ew00311b2.pdf [file d2ew00311b2.pdf]

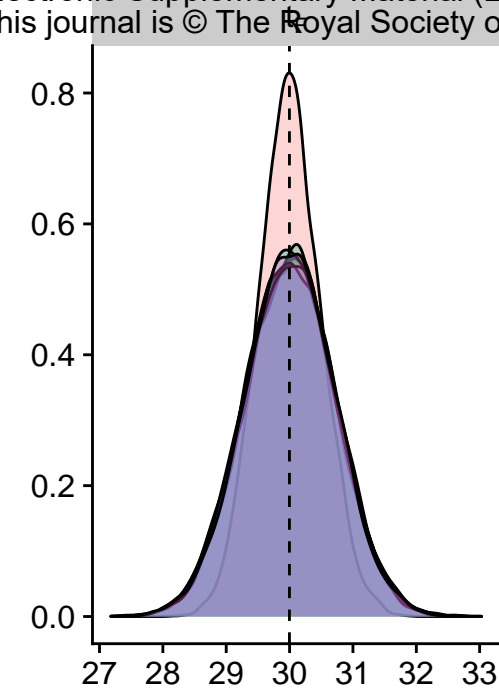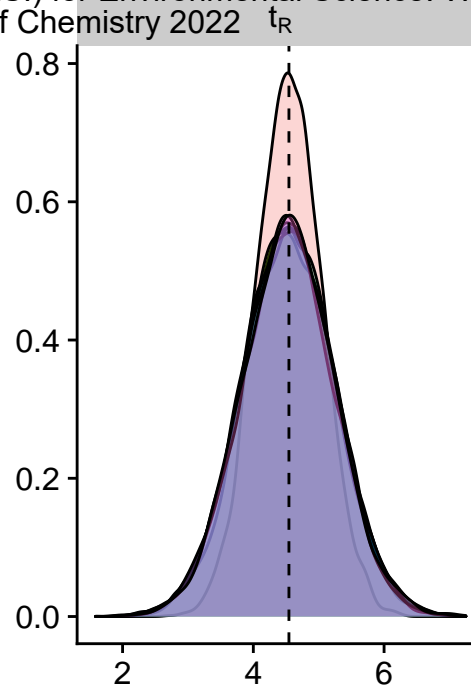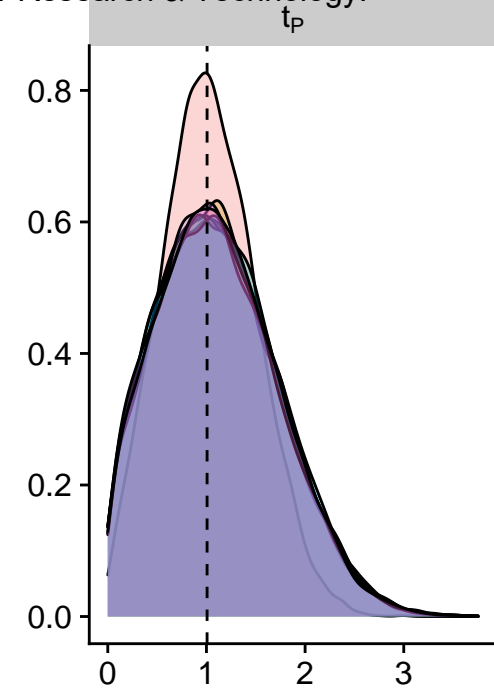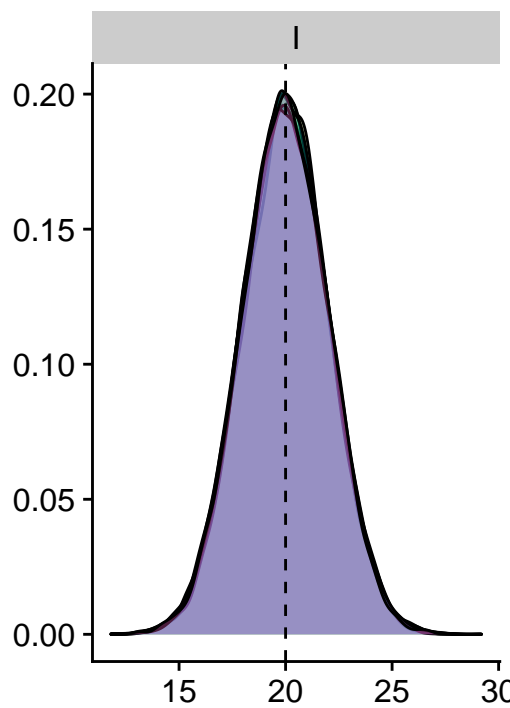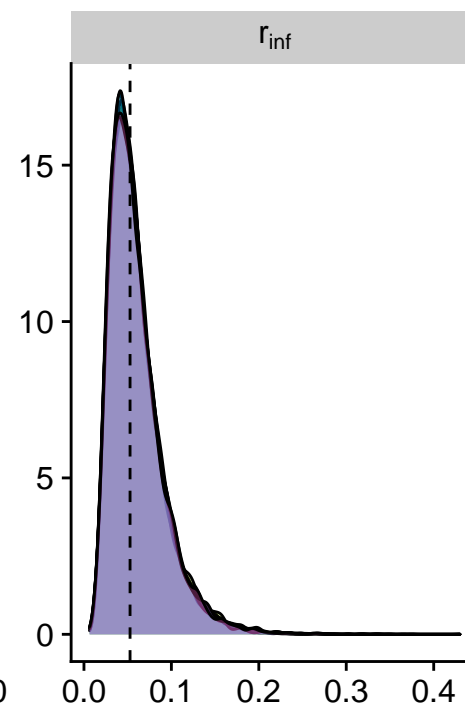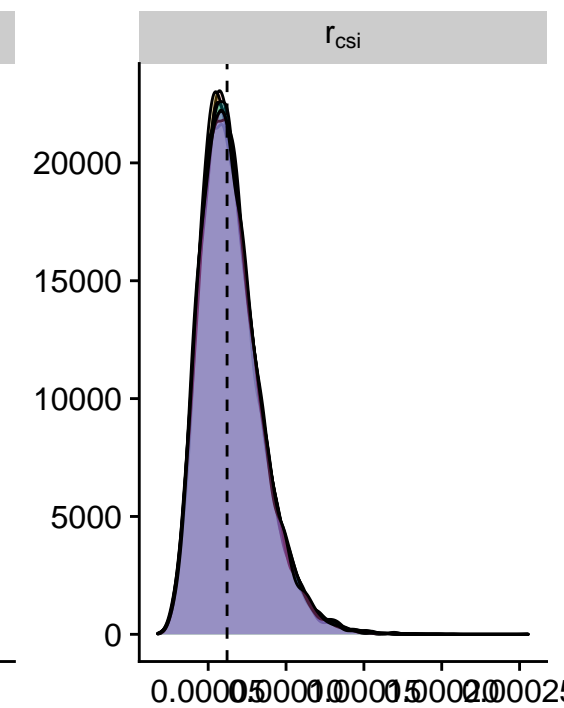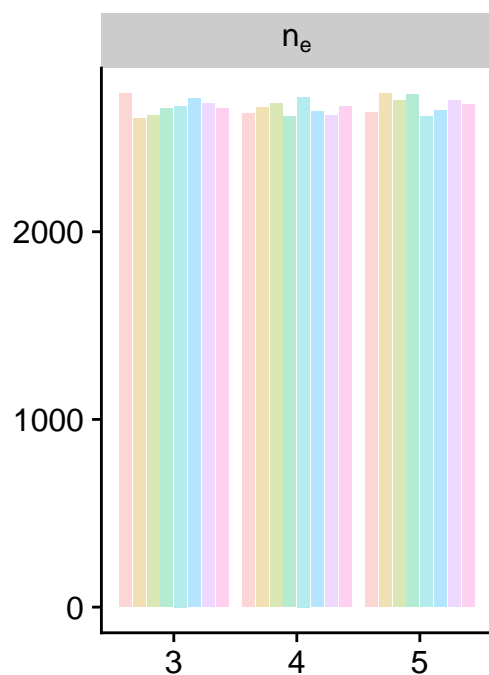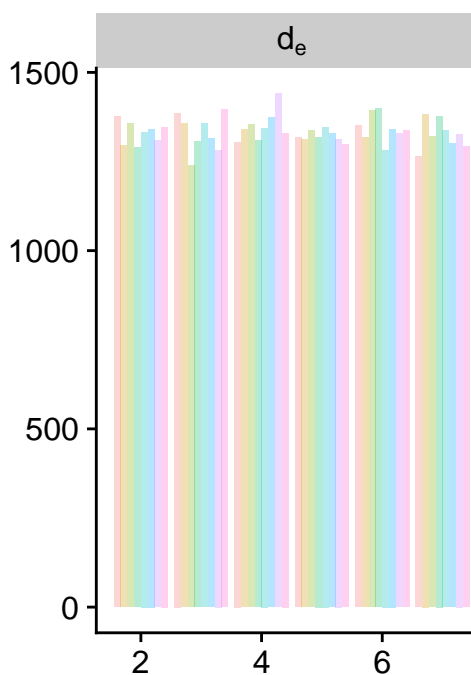

Supplement: d2ew00311b3.pdf [file d2ew00311b3.pdf]

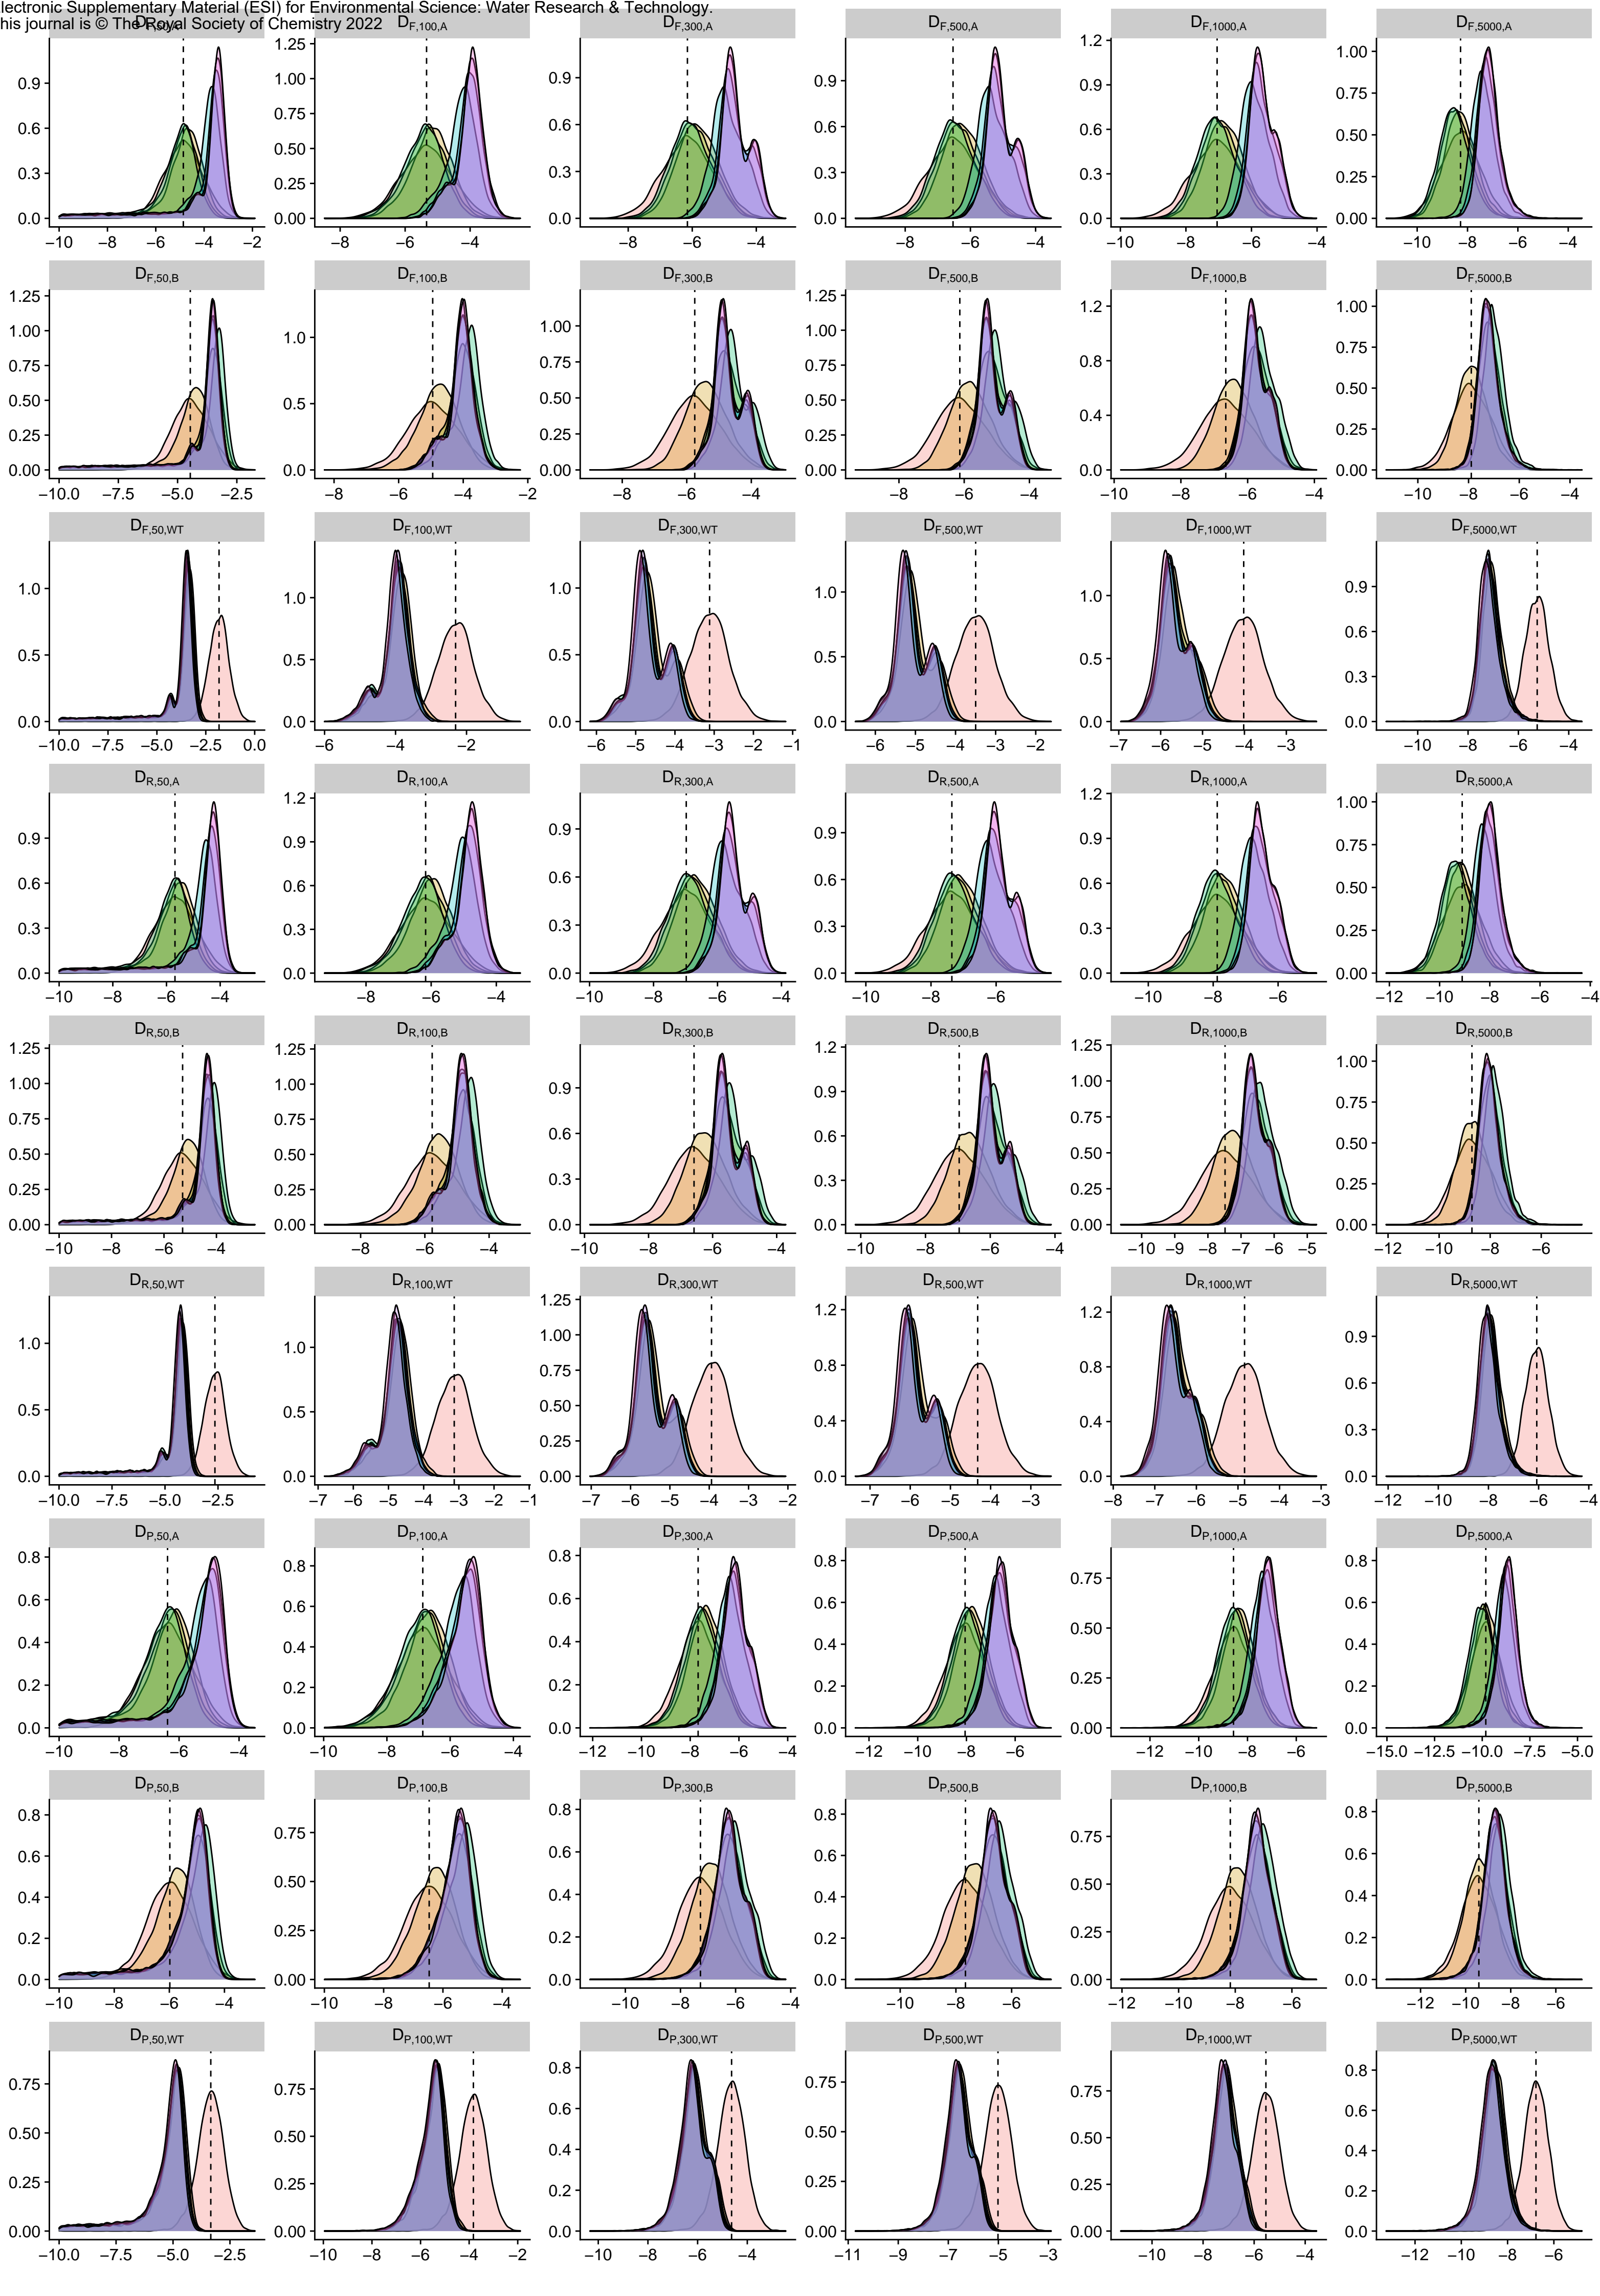

Supplement: d2ew00311b4.pdf [file d2ew00311b4.pdf]

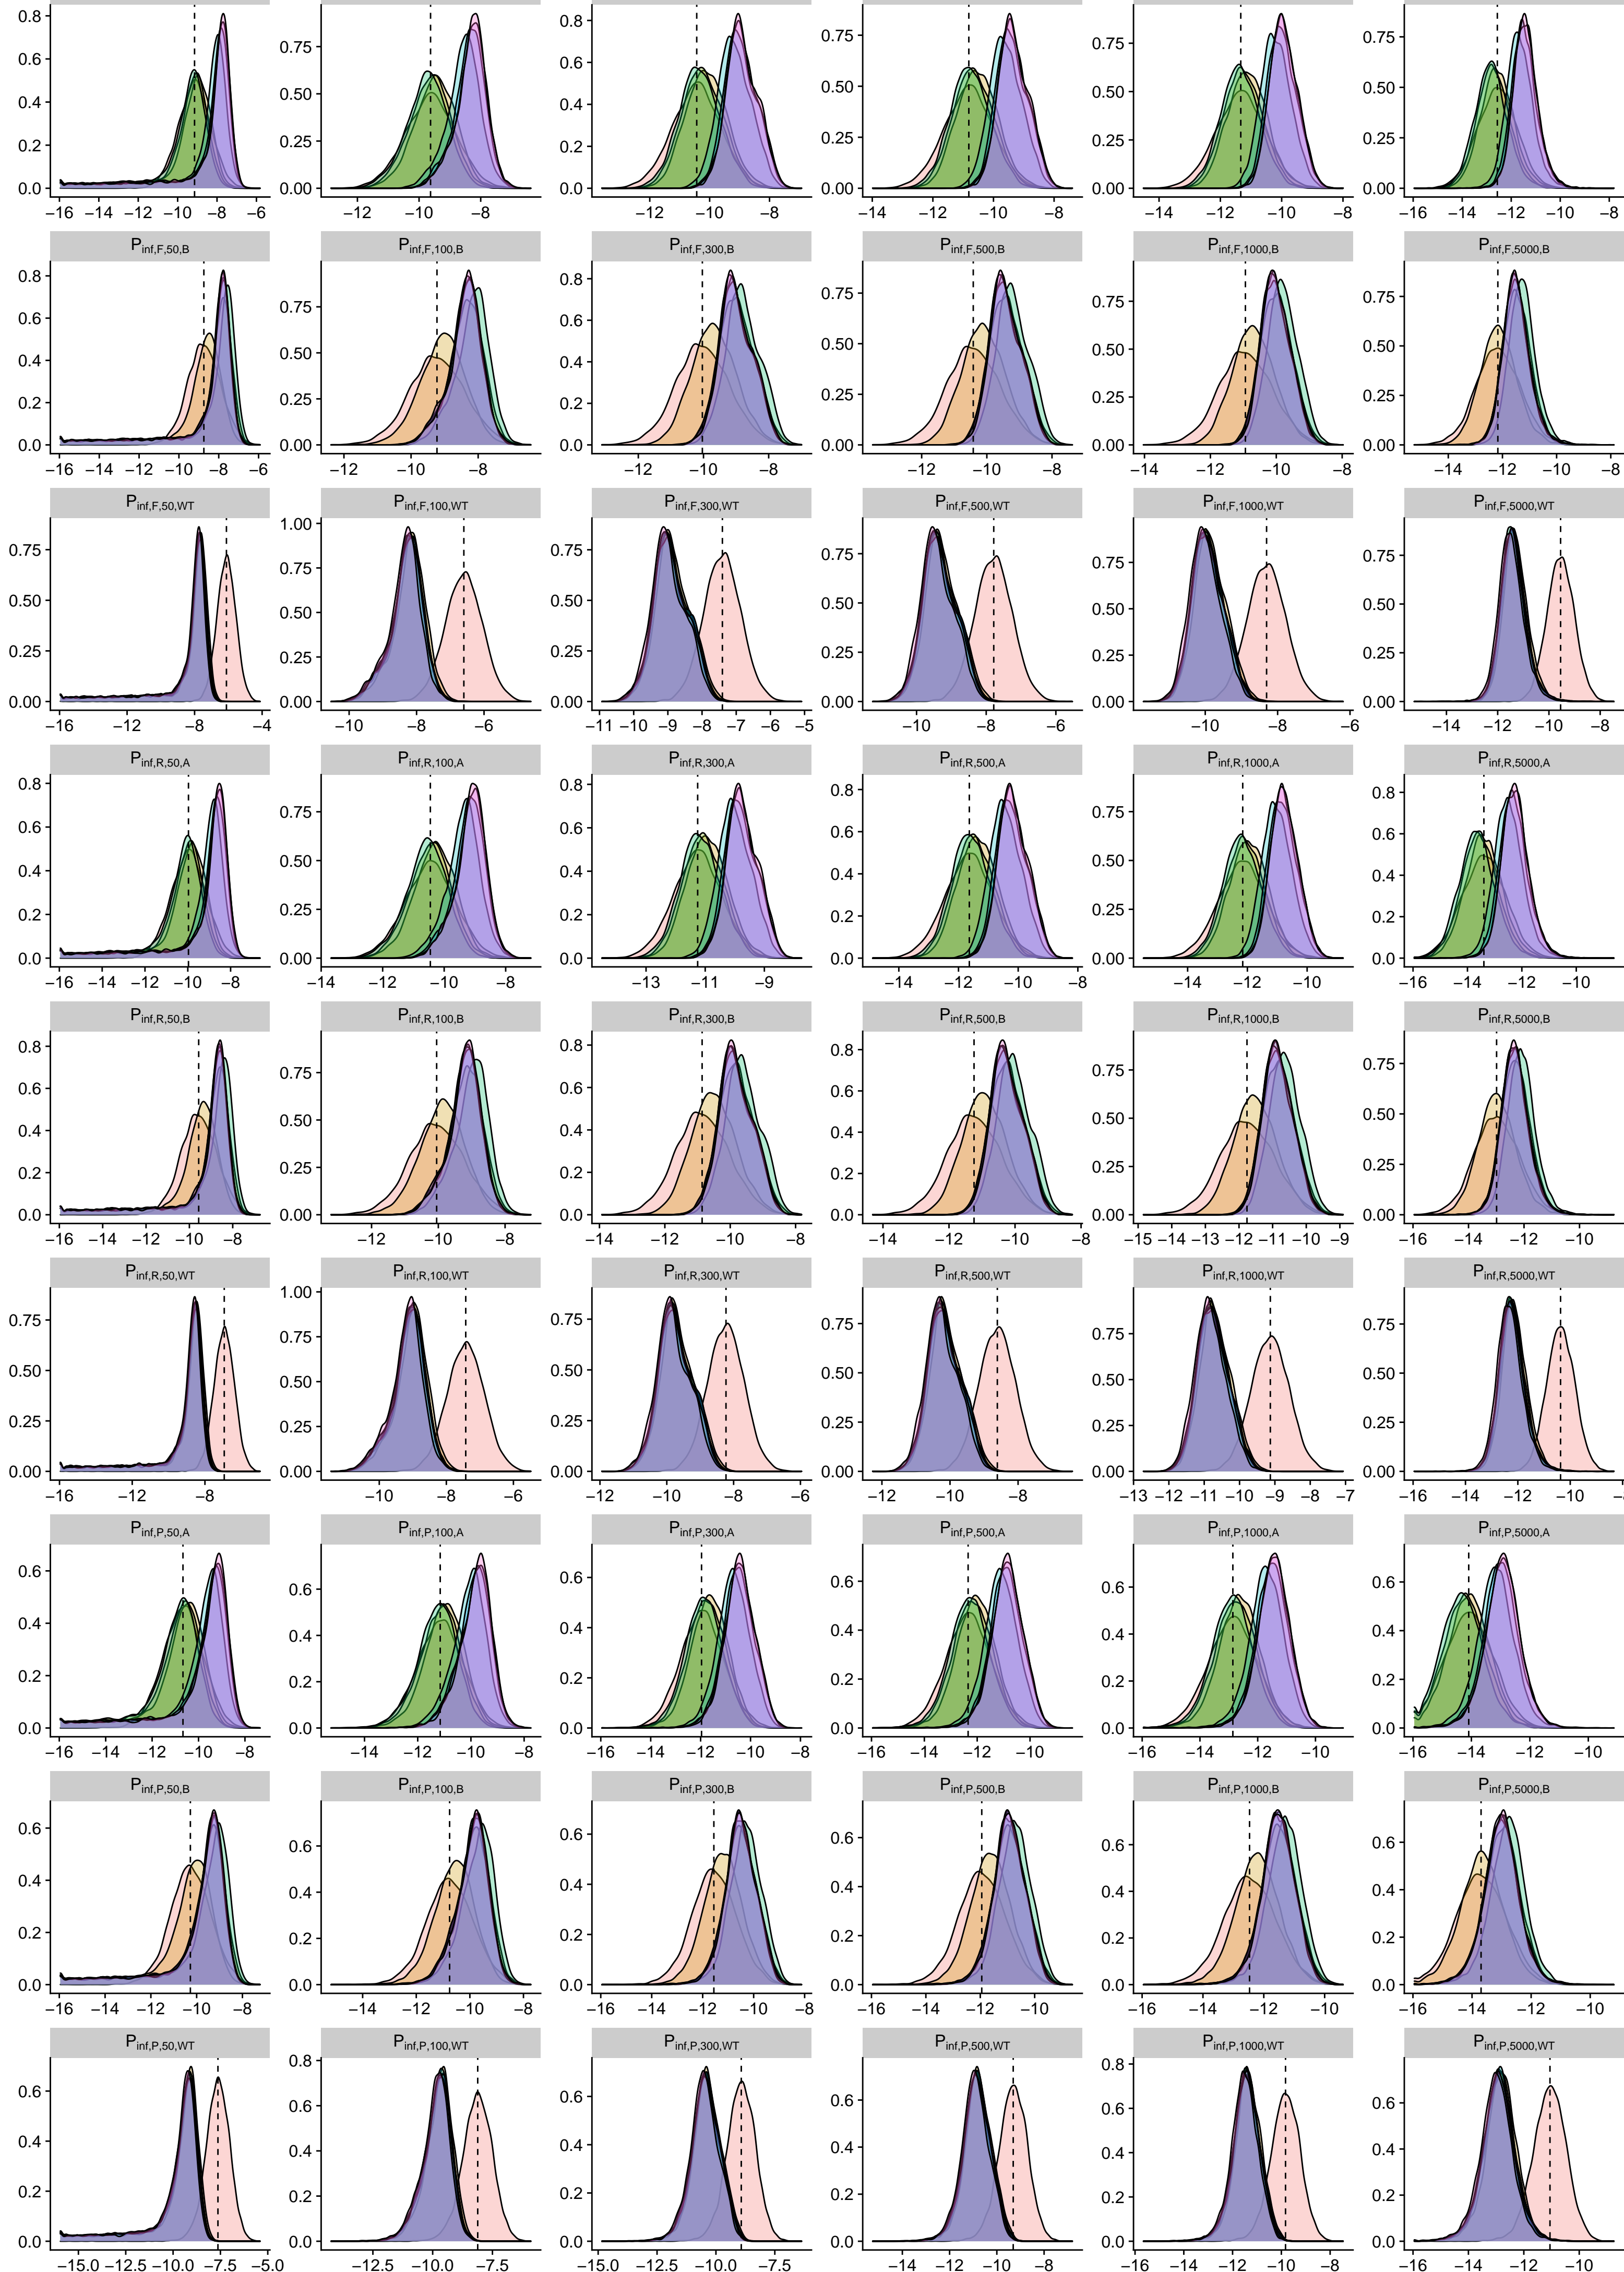

Supplement: d2ew00311b5.pdf [file d2ew00311b5.pdf]

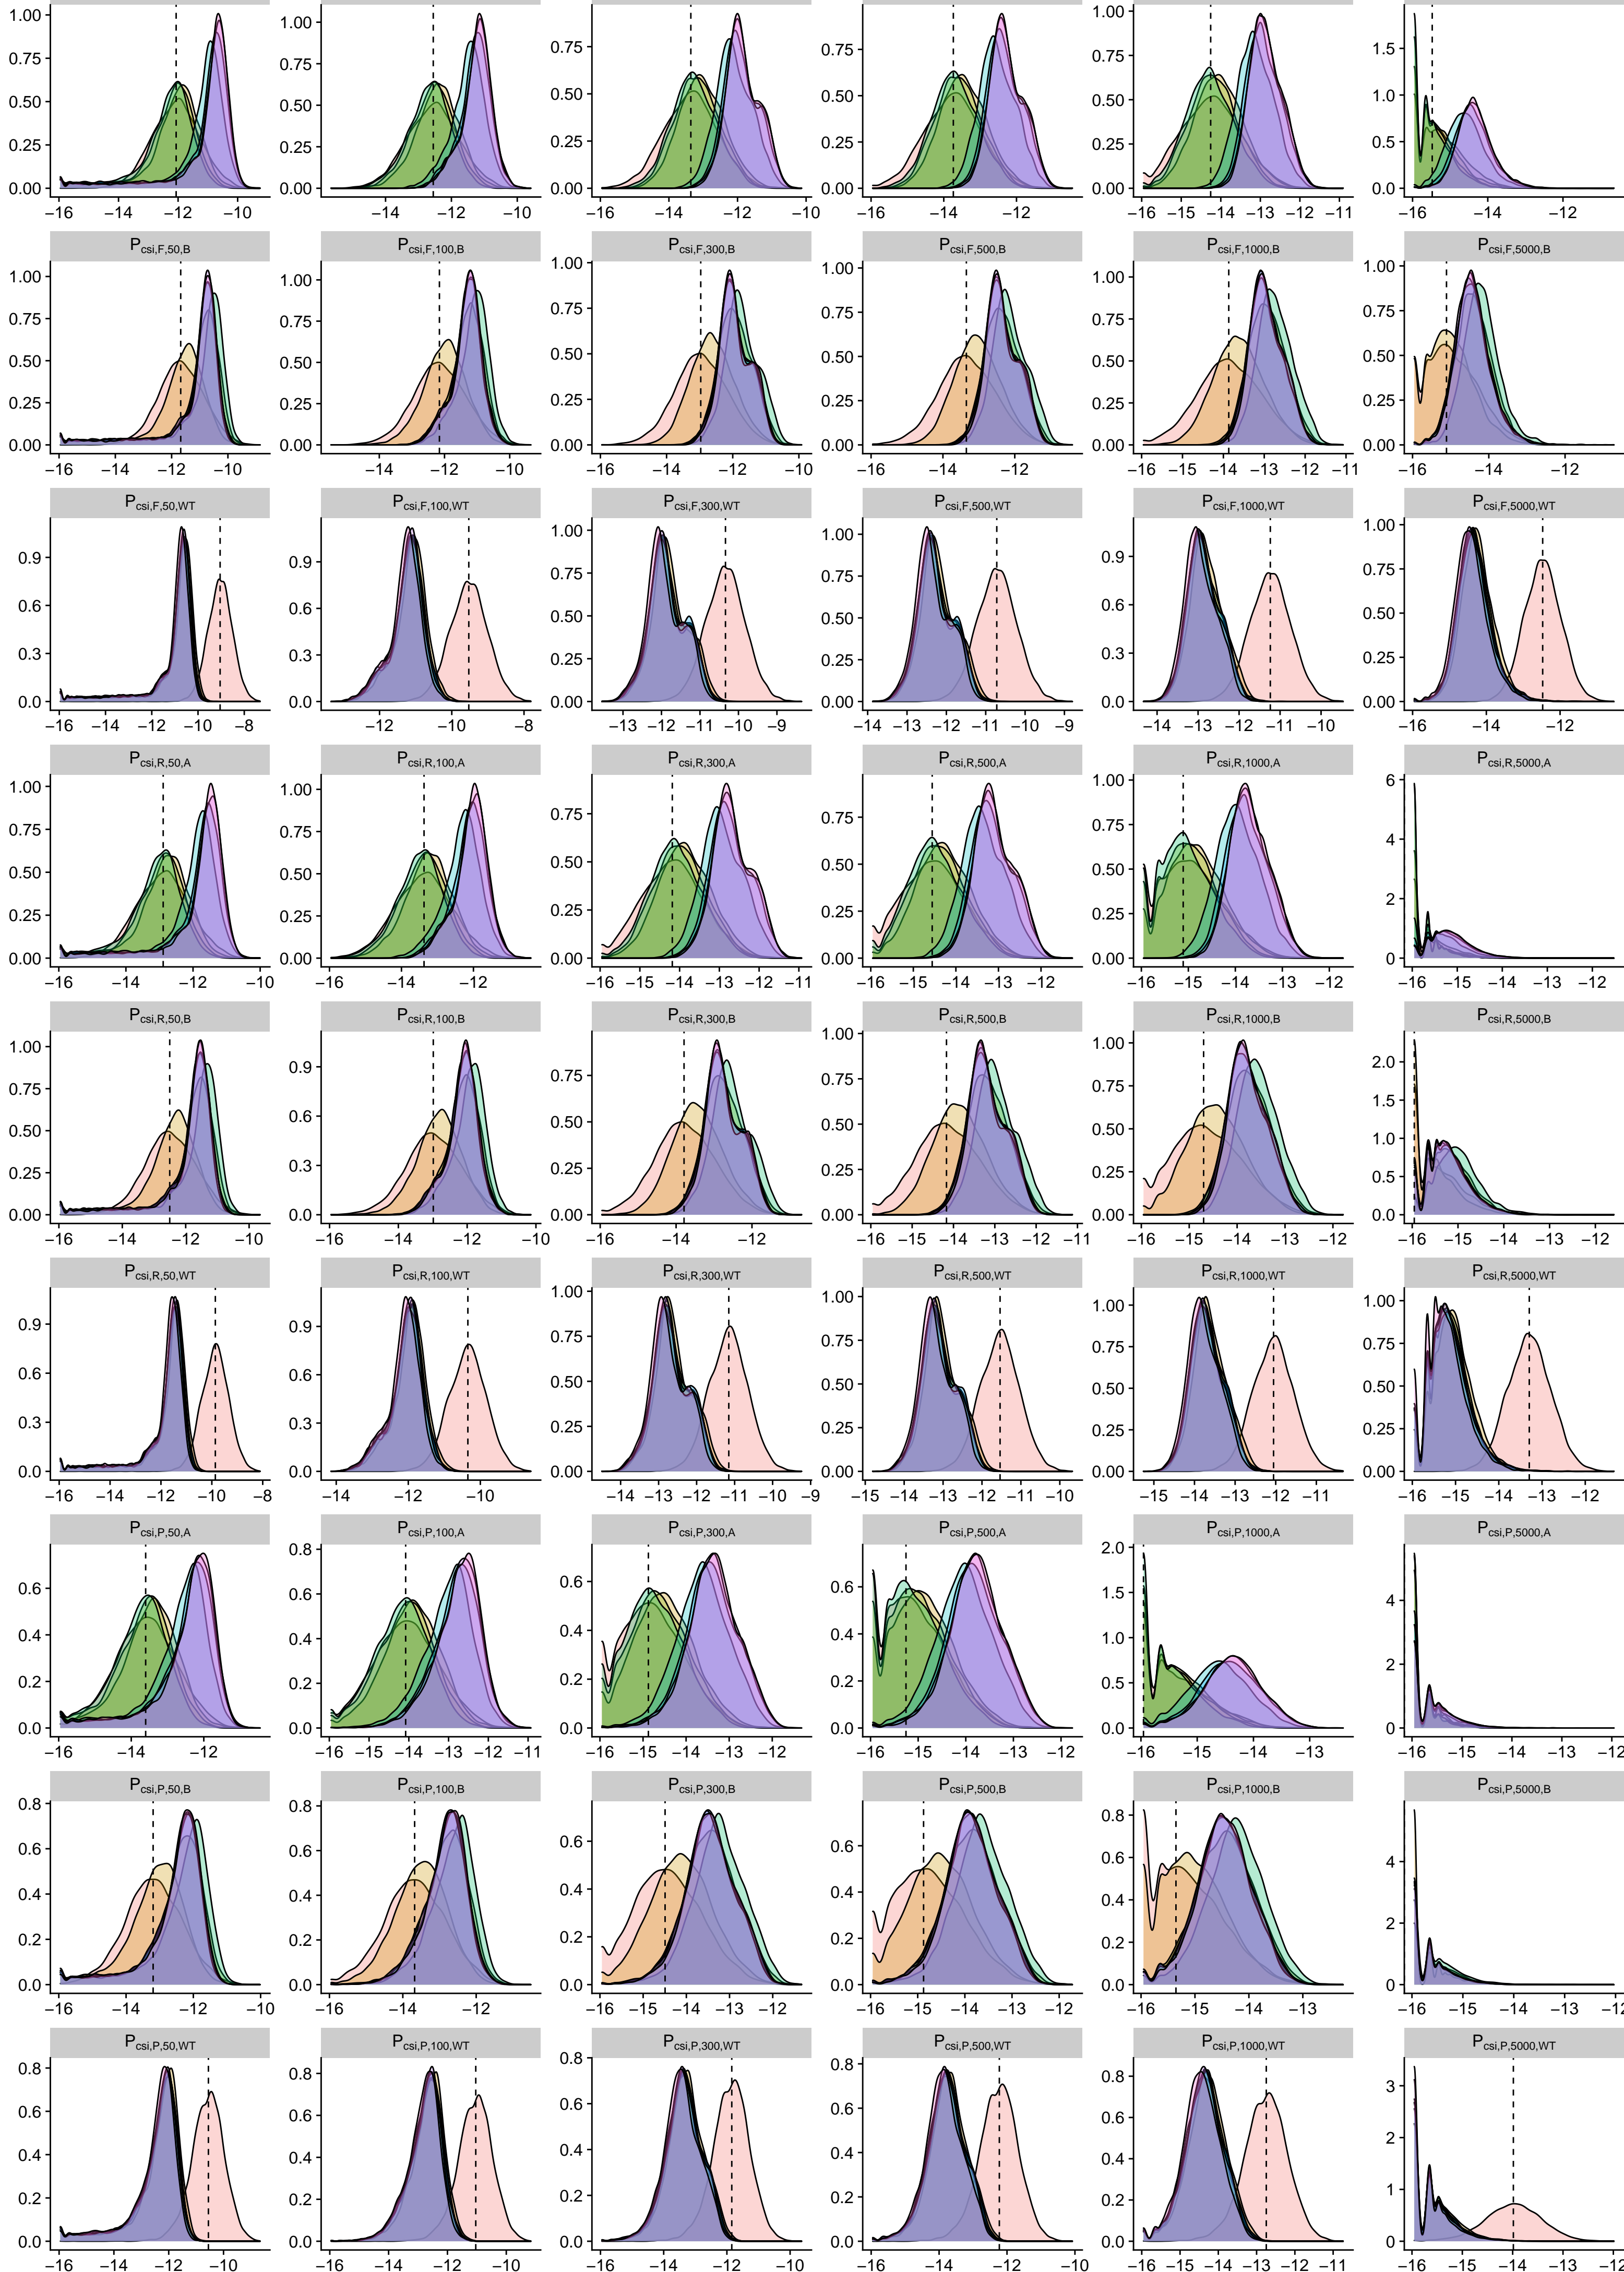

Supplement: d2ew00311b6.pdf [file d2ew00311b6.pdf]

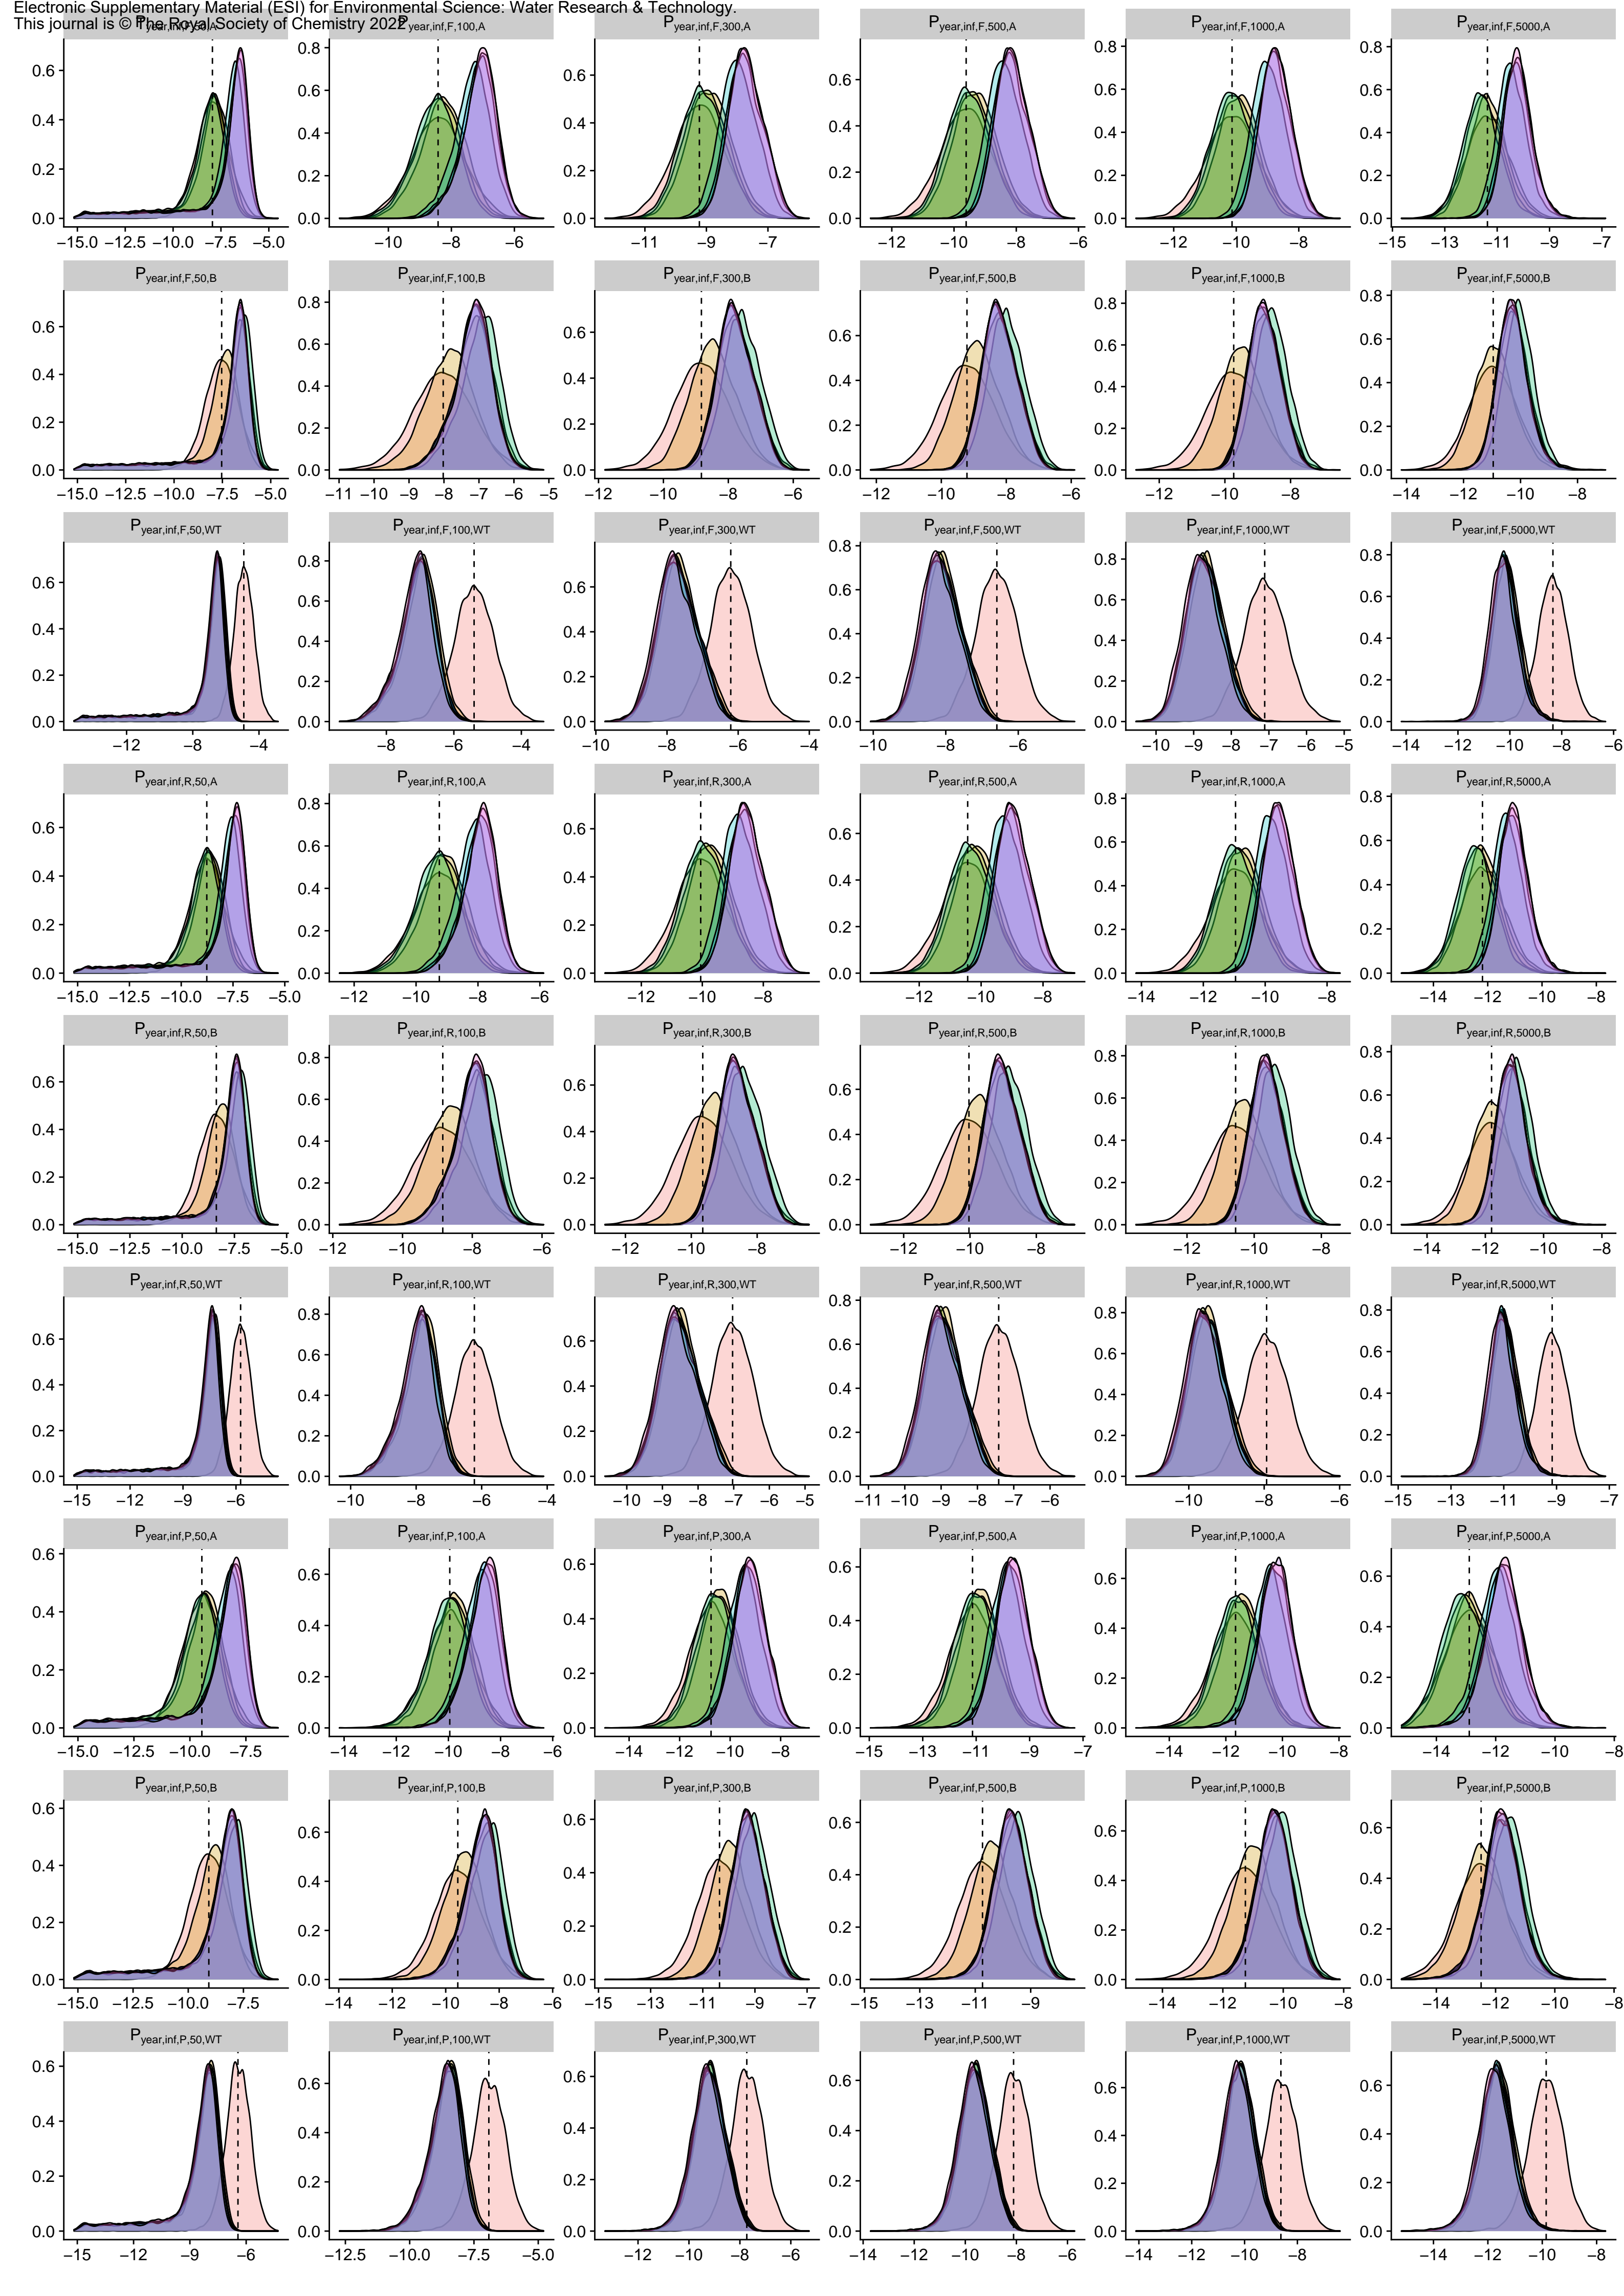

Supplement: d2ew00311b7.pdf [file d2ew00311b7.pdf]

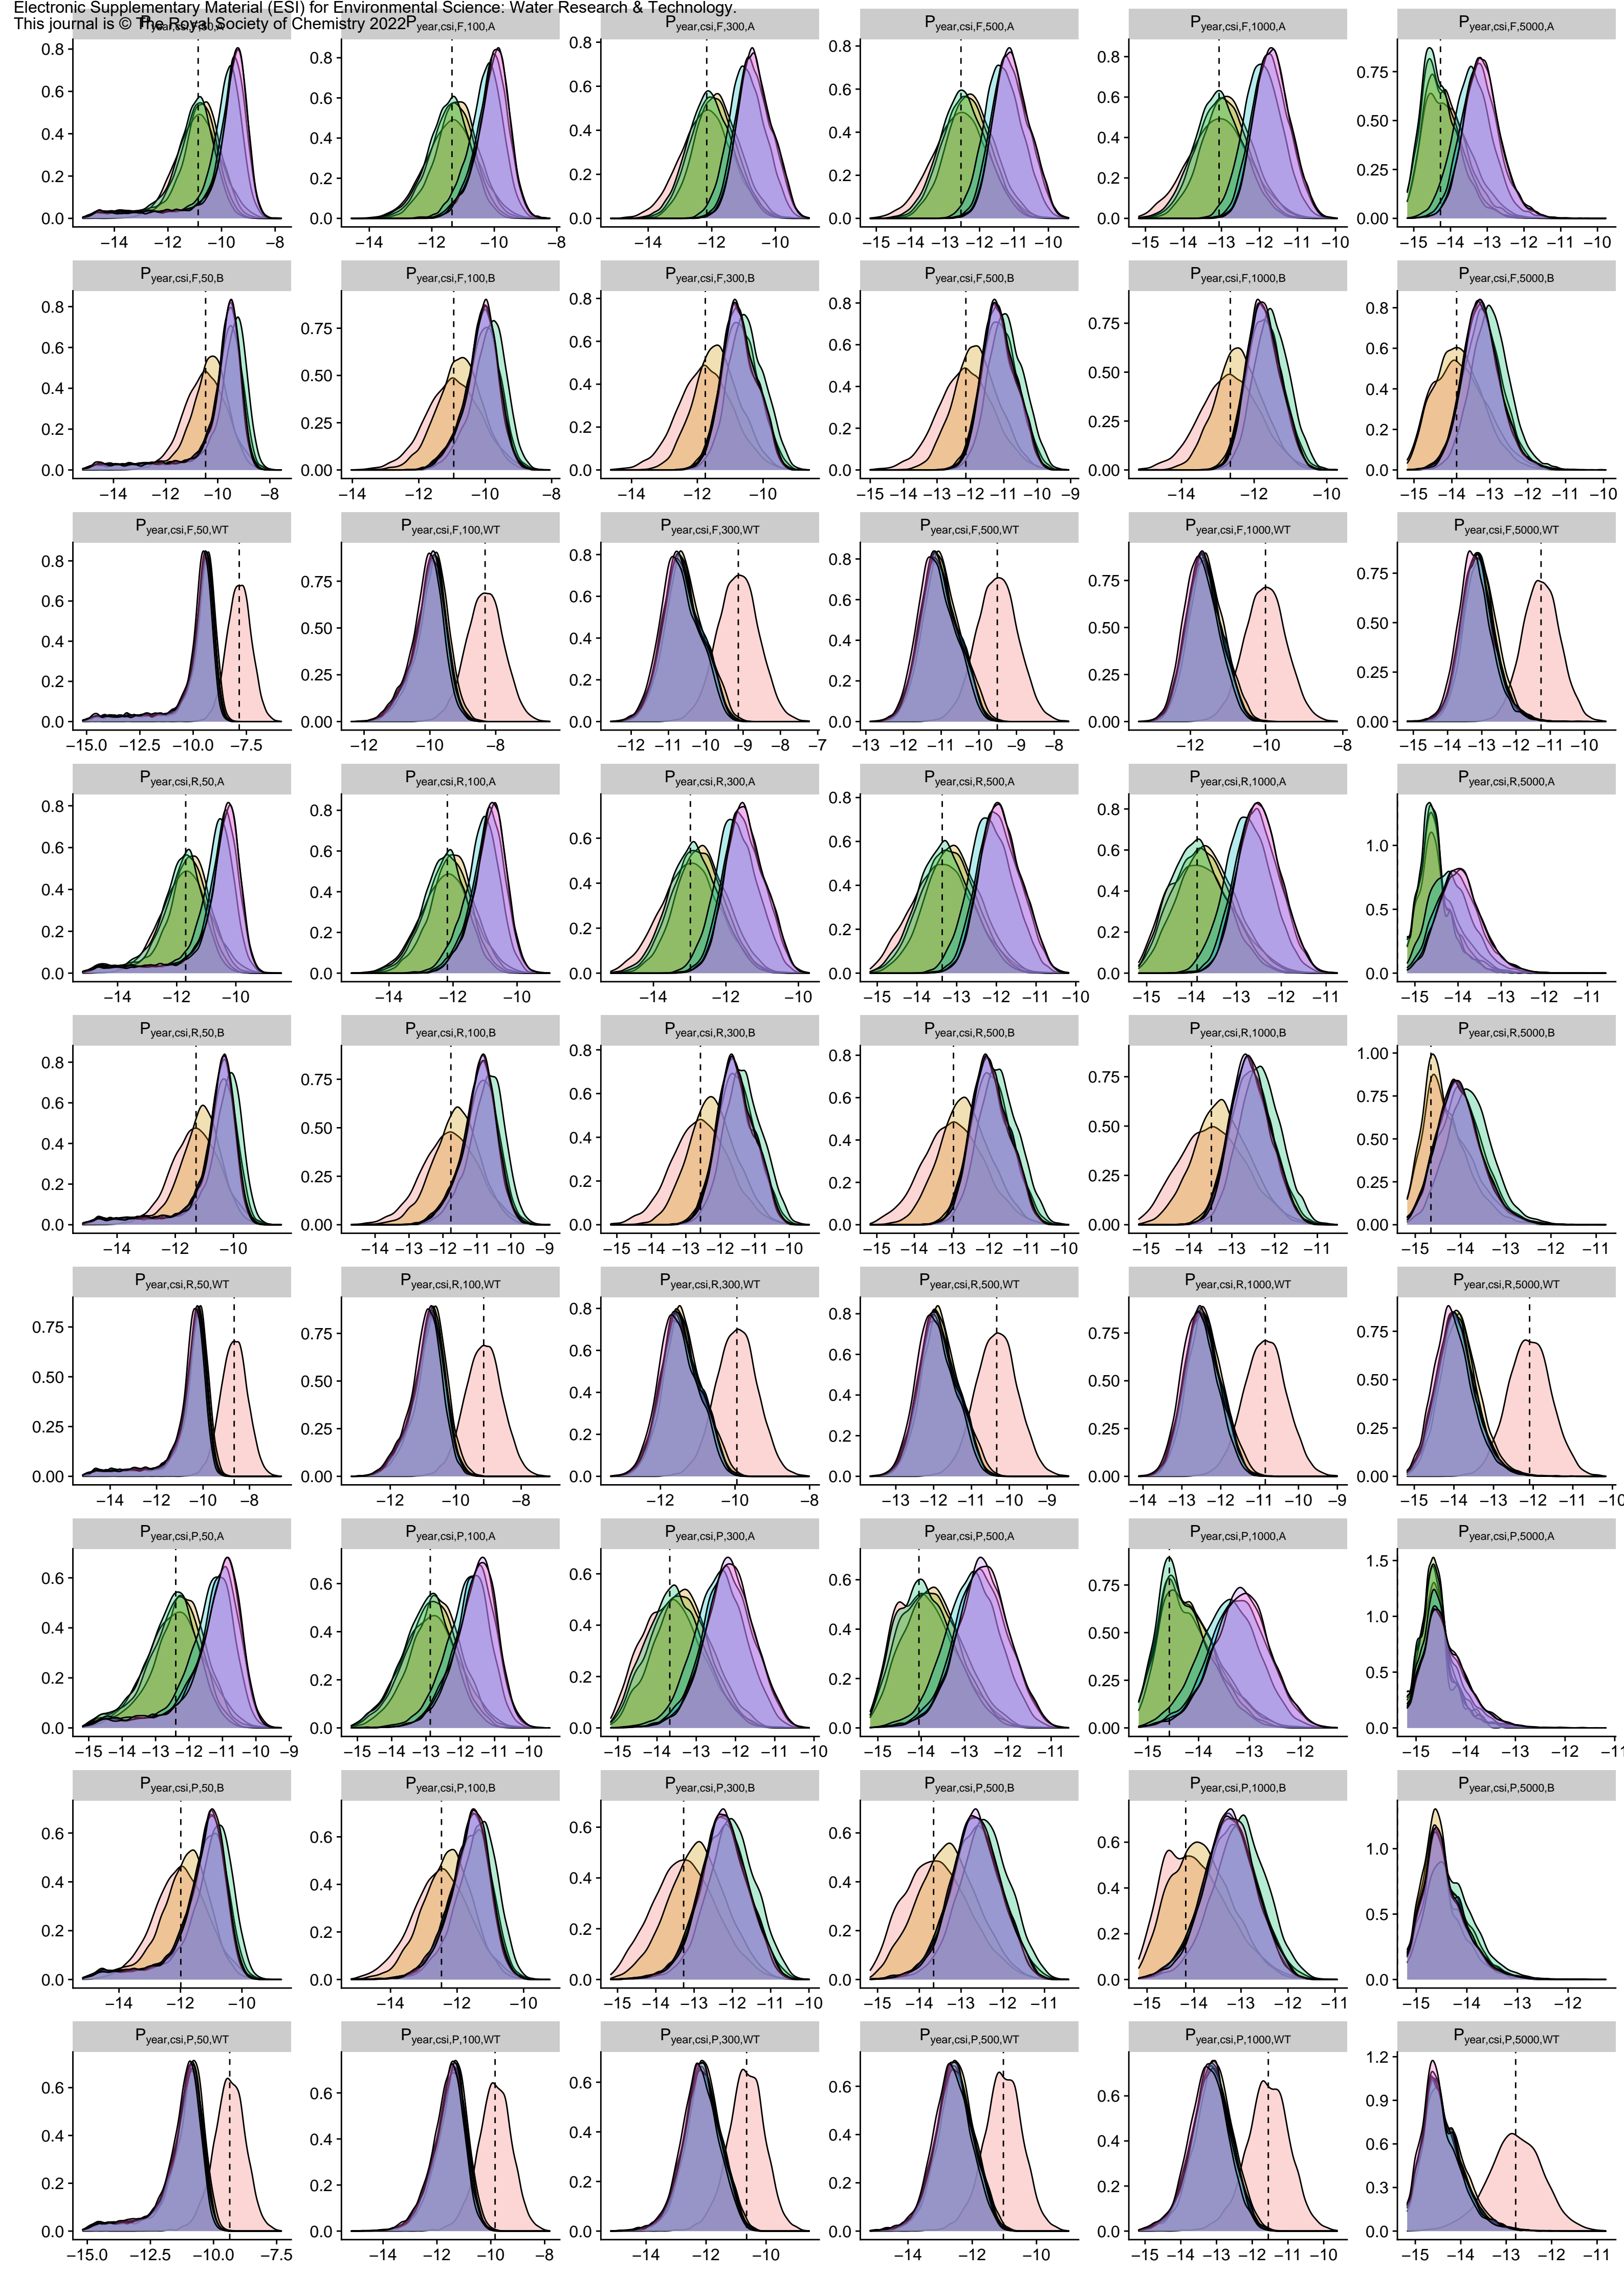

Supplement: d2ew00311b8.pdf [file d2ew00311b8.pdf]
